# Supplementary material for: Design and Accuracy of an Instrumented Insole Using Pressure Sensors for Step Count
Source: PubMed Central journal article supplement (PMC6427154; doi:10.3390/s19050984), 2019-02-26
Supplement: sensors-19-00984-s001.pdf [file sensors-19-00984-s001.pdf]

## Supplementary Materials

Table S1. Accuracies for step count using instrumented insole, and GaitUp compared with manual counting at self-selected speed ( $1.43 \pm 0.18$  m/s)<sup>a</sup> in indoor

| Participants   | Individual FSR   |                   |                   |                   |                  | Combined five FSRs |                | GaitUp     |
|----------------|------------------|-------------------|-------------------|-------------------|------------------|--------------------|----------------|------------|
|                | FSR <sub>H</sub> | FSR <sub>M5</sub> | FSR <sub>M3</sub> | FSR <sub>M1</sub> | FSR <sub>T</sub> | Average            | Cumulative sum |            |
| 1              | 98.7%            | 96.5%             | 91.7%             | 68.5%             | 91.4%            | 96.2%              | 100.0%         | 100.0%     |
| 2              | 99.7%            | 100.0%            | 97.8%             | 99.1%             | 95.6%            | 99.1%              | 100.0%         | 99.7%      |
| 3              | 97.5%            | 100.0%            | 97.2%             | 99.3%             | 97.9%            | 98.9%              | 97.9%          | 100.0%     |
| 4              | 95.3%            | 99.1%             | 95.6%             | 96.8%             | 99.7%            | 96.2%              | 100.0%         | 99.7%      |
| 5              | 100.0%           | 100.0%            | 99.8%             | 99.8%             | 99.8%            | 95.5%              | 99.5%          | 99.3%      |
| 6              | 100.0%           | 92.6%             | 99.4%             | 83.9%             | 92.0%            | 93.5%              | 100.0%         | 100.0%     |
| 7              | 93.5%            | 99.7%             | 88.7%             | 100.0%            | 98.6%            | 94.4%              | 99.7%          | 100.0%     |
| 8              | 100.0%           | 95.3%             | 99.2%             | 96.1%             | 95.8%            | 97.4%              | 100.0%         | 100.0%     |
| 9              | 99.5%            | 100.0%            | 100.0%            | 99.5%             | 99.0%            | 94.2%              | 98.7%          | 99.7%      |
| 10             | 100.0%           | 95.6%             | 96.8%             | 95.6%             | 93.0%            | 99.1%              | 100.0%         | NA         |
| 11             | 98.8%            | 100.0%            | 98.8%             | 99.7%             | 99.7%            | 86.2%              | 100.0%         | 100.0%     |
| 12             | 98.6%            | 97.8%             | 98.6%             | 98.9%             | 97.8%            | 94.8%              | 98.6%          | 100.0%     |
| <b>Mean±SD</b> | 98.5%±2.1%       | 98.1%±2.5%        | 97.0%±3.5%        | 94.8%±9.4%        | 96.7%±3.1%       | 95.5%±3.5%         | 99.5%±0.7%     | 99.9%±0.2% |

a: Walking speeds were measured with GaitUp ; NA: Non Available.

**Table S2.** Accuracies for step count using instrumented insole, and GaitUp compared with manual counting at maximal speed ( $1.73 \pm 0.08$  m/s)<sup>a</sup> in indoor

| Participants   | Individual FSR   |                   |                   |                   |                  | Combined five FSRs |                | GaitUp     |
|----------------|------------------|-------------------|-------------------|-------------------|------------------|--------------------|----------------|------------|
|                | FSR <sub>H</sub> | FSR <sub>M5</sub> | FSR <sub>M3</sub> | FSR <sub>M1</sub> | FSR <sub>T</sub> | Average            | Cumulative sum |            |
| 1              | 98.7%            | 99.7%             | 99.2%             | 99.0%             | 99.0%            | 99.2%              | 100.0%         | 100.0%     |
| 2              | 98.9%            | 98.9%             | 99.2%             | 98.7%             | 100.0%           | 99.7%              | 99.7%          | 99.7%      |
| 3              | 97.9%            | 99.2%             | 97.6%             | 98.7%             | 99.5%            | 99.7%              | 100.0%         | 100.0%     |
| 4              | 98.1%            | 98.8%             | 98.6%             | 99.8%             | 99.3%            | 99.8%              | 99.3%          | 100.0%     |
| 5              | 99.8%            | 99.8%             | 99.8%             | 99.8%             | 99.5%            | 99.5%              | 99.1%          | 100.0%     |
| 6              | 99.7%            | 99.2%             | 99.7%             | 97.7%             | 98.7%            | 95.3%              | 100.0%         | 100.0%     |
| 7              | 98.7%            | 98.7%             | 99.7%             | 99.0%             | 98.2%            | 98.2%              | 99.0%          | 99.5%      |
| 8              | 98.1%            | 98.8%             | 98.3%             | 98.8%             | 98.5%            | 98.8%              | 99.0%          | 99.5%      |
| 9              | 95.9%            | 99.0%             | 95.3%             | 95.3%             | 98.8%            | 100.0%             | 99.8%          | 99.8%      |
| 10             | 96.9%            | 97.1%             | 90.6%             | 99.3%             | 95.4%            | 99.0%              | 99.8%          | 99.5%      |
| 11             | 99.7%            | 99.0%             | 99.7%             | 97.7%             | 97.1%            | 99.0%              | 100.0%         | 99.7%      |
| 12             | 99.2%            | 99.5%             | 99.2%             | 99.2%             | 99.5%            | 92.8%              | 99.2%          | 100.0%     |
| <b>Mean±SD</b> | 98.4%±1.2%       | 99.0%±0.7%        | 98.1%±2.7%        | 98.6%±1.2%        | 98.6%±1.3%       | 98.6%±2.2%         | 99.6%±0.4%     | 99.8%±0.2% |

a: Walking speeds were measured with GaitUp.

**Table S3.** Accuracies for step count using instrumented insole, and GaitUp compared with manual counting at self-selected speed ( $1.45 \pm 0.20$  m/s)<sup>a</sup> in outdoor

| Participants   | Individual FSR   |                   |                   |                   |                  | Combined five FSRs |                | GaitUp    |
|----------------|------------------|-------------------|-------------------|-------------------|------------------|--------------------|----------------|-----------|
|                | FSR <sub>H</sub> | FSR <sub>M5</sub> | FSR <sub>M3</sub> | FSR <sub>M1</sub> | FSR <sub>T</sub> | Average            | Cumulative sum |           |
| 1              | 99.4%            | 99.7%             | 99.7%             | 98.8%             | 98.8%            | 99.1%              | 99.7%          | 100.0%    |
| 2              | 98.9%            | 100.0%            | 99.7%             | 99.5%             | 99.7%            | 99.7%              | 100.0%         | 100.0%    |
| 3              | 98.0%            | 98.2%             | 98.2%             | 99.1%             | 99.7%            | 99.7%              | 98.8%          | 99.4%     |
| 4              | 98.3%            | 100.0%            | 100.0%            | 99.7%             | 99.3%            | 99.1%              | 100.0%         | 99.8%     |
| 5              | 99.7%            | 99.5%             | 99.0%             | 99.2%             | 99.2%            | 96.9%              | 99.2%          | 99.7%     |
| 6              | 99.1%            | 83.6%             | 97.0%             | 80.5%             | 82.7%            | 95.4%              | 99.7%          | 99.1%     |
| 7              | 100.0%           | 97.8%             | 96.1%             | 99.7%             | 98.6%            | 96.1%              | 99.4%          | 99.7%     |
| 8              | 92.1%            | 95.0%             | 92.4%             | 95.8%             | 95.0%            | 86.4%              | 100.0%         | 100.0%    |
| 9              | 95.9%            | 99.1%             | 97.7%             | 99.1%             | 97.7%            | 94.7%              | 99.1%          | 99.7%     |
| 10             | 99.4%            | 99.4%             | 94.9%             | 98.4%             | 97.8%            | 99.0%              | 100.0%         | 100.0%    |
| 11             | 96.1%            | 89.5%             | 95.5%             | 91.6%             | 93.1%            | 92.8%              | 99.1%          | 100.0%    |
| 12             | 99.5%            | 99.2%             | 98.9%             | 98.9%             | 98.1%            | 98.6%              | 99.5%          | 100.0%    |
| <b>Mean±SD</b> | 98.0±2.3%        | 96.7±5.1%         | 97.4±2.3%         | 96.7±5.6%         | 96.6±4.8%        | 96.5±3.9%          | 99.5±0.4%      | 99.8±0.3% |

a: Walking speeds were measured with GaitUp.

**Table S4.** Accuracies for step count using instrumented insole, and GaitUp compared with manual counting at maximal speed ( $1.78 \pm 0.12$  m/s)<sup>a</sup> in outdoor

| Participants   | Individual FSR   |                   |                   |                   |                  | Combined five FSRs |                | GaitUp    |
|----------------|------------------|-------------------|-------------------|-------------------|------------------|--------------------|----------------|-----------|
|                | FSR <sub>H</sub> | FSR <sub>M5</sub> | FSR <sub>M3</sub> | FSR <sub>M1</sub> | FSR <sub>T</sub> | Average            | Cumulative sum |           |
| 1              | 100.0%           | 99.5%             | 100.0%            | 99.5%             | 99.7%            | 98.0%              | 99.7%          | 99.7%     |
| 2              | 99.8%            | 99.0%             | 98.3%             | 99.8%             | 99.8%            | 98.3%              | 99.8%          | 99.8%     |
| 3              | 98.7%            | 99.7%             | 99.0%             | 99.7%             | 100.0%           | 97.4%              | 99.0%          | 100.0%    |
| 4              | 100.0%           | 96.7%             | 97.6%             | 97.6%             | 97.6%            | 96.2%              | 100.0%         | 99.8%     |
| 5              | 99.8%            | 99.1%             | 99.8%             | 99.1%             | 99.3%            | 98.0%              | 99.3%          | 100.0%    |
| 6              | 99.5%            | 99.0%             | 99.5%             | 98.2%             | 98.7%            | 92.4%              | 98.7%          | 99.5%     |
| 7              | 100.0%           | 99.8%             | 99.8%             | 99.8%             | 100.0%           | 99.0%              | 100.0%         | 99.5%     |
| 8              | 99.8%            | 97.6%             | 99.5%             | 98.3%             | 99.5%            | 98.5%              | 99.3%          | 99.8%     |
| 9              | 99.8%            | 96.0%             | 97.8%             | 97.2%             | 100.0%           | 87.5%              | 100.0%         | 99.8%     |
| 10             | 95.9%            | 77.7%             | 96.6%             | 99.0%             | 98.8%            | 99.8%              | 99.5%          | 100.0%    |
| 11             | 99.7%            | 99.7%             | 100.0%            | 99.7%             | 99.7%            | 99.2%              | 100.0%         | 100.0%    |
| 12             | 99.7%            | 99.7%             | 99.7%             | 99.7%             | 99.7%            | 99.5%              | 99.7%          | 100.0%    |
| <b>Mean±SD</b> | 99.4±1.2%        | 97.0±6.2%         | 99.0±1.1%         | 99.0±0.9%         | 99.4±0.7%        | 97.0±3.6%          | 99.6±0.4%      | 99.8±0.2% |

a: Walking speeds were measured with GaitUp.
